# Supplementary material
Source: publisher figshare collection journal article supplement (https://karger.figshare.com/ndownloader/files/21727080)
Supplement: Supplementary file 1 [file 21727080]

## Supplementary Material

**Table S1. Characteristics of patients with unspecified stroke stratified by sex.**

|  | **Men**  n = 140 | **Women**  n = 325 |
| --- | --- | --- |
| Age, mean (SD), years | 82.2 (8.4) | 86.8 (7.1) |
| Diagnosing physician, no. (%)  General practitioner  Nursing home physician  Neurologist  Other physician  Missing | 80 (57.1)  17 (12.1)  25 (17.9)  10 (7.1)  8 (5.7) | 153 (47.1)  84 (25.8)  53 (16.3)  18 (5.5)  17 (5.2) |
| Hospitalization after stroke, no. (%)  Yes  No  Missing or unknown | 28 (20.0)  103 (73.6)  9 (6.4) | 63 (19.4)  238 (73.2)  24 (7.4) |
| Demented at stroke diagnosis, no. (%)  Yes  No  Missing | 34 (24.3)  101 (72.1)  5 (3.6) | 119 (36.6)  140 (43.1)  10 (3.1) |

Abbreviations: SD: standard deviation, no.: number.
